# Supplementary material for: Grammatical errors produced by students of the English department at Petra Christian University in their writing
Source: Royal Society of Chemistry journal article supplement (doi:10.1039/c7dt03175k), 2002-01-01
Supplement: c7dt03175k1.pdf [file c7dt03175k1.pdf]

## Synthesis and Oxidation of Phosphine Cations<sup>†</sup>

Meera Mehta, Timothy C. Johnstone, Jolie Lam, Bidraha Bagh, André Hermannsdorfer, Matthias Driess\* and Douglas W. Stephan\*

### Supporting Information

|                                                                                                                                                               |           |
|---------------------------------------------------------------------------------------------------------------------------------------------------------------|-----------|
| 1. Syntheses and Spectroscopic Data .....                                                                                                                     | 2         |
| 1.1. Preparation of [(IBox- <i>i</i> Pr <sub>2</sub> )PPh <sub>2</sub> ][OTf] (1) .....                                                                       | 2         |
| <b>1.2. Preparation of [(cAAC)PPh<sub>2</sub>][OTf] (2) .....</b>                                                                                             | <b>3</b>  |
| <b>1.3. Preparation of [((TripCH<sub>2</sub>N<sub>2</sub>(NMe)C<sub>2</sub>Ph)PPh<sub>2</sub>)<sub>2</sub>(AgCl)<sub>2</sub>][Cl]<sub>2</sub> (3).....</b>    | <b>4</b>  |
| <b>1.4. Preparation of [CH<sub>2</sub>(NC<sub>3</sub>H<sub>2</sub>NDipp)<sub>2</sub>PPh][OTf]<sub>2</sub> (4a) .....</b>                                      | <b>5</b>  |
| <b>1.5. Preparation of [CH<sub>2</sub>(NC<sub>3</sub>H<sub>2</sub>NDipp)<sub>2</sub>PPh][B(C<sub>6</sub>F<sub>5</sub>)<sub>4</sub>]<sub>2</sub> (4b).....</b> | <b>6</b>  |
| 1.6. Preparation of [(IBox- <i>i</i> Pr <sub>2</sub> )PF <sub>2</sub> Ph <sub>2</sub> ][OTf] (5) .....                                                        | 7         |
| <b>1.7. Preparation of [(cAAC)PF<sub>2</sub>Ph<sub>2</sub>][OTf] (6) .....</b>                                                                                | <b>8</b>  |
| <b>1.8. Preparation of [(TripCH<sub>2</sub>N<sub>2</sub>(NMe)C<sub>2</sub>Ph)PF<sub>2</sub>Ph<sub>2</sub>][Cl] (7).....</b>                                   | <b>10</b> |
| 2. Crystallographic Details .....                                                                                                                             | 12        |
| 3. Computations Studies .....                                                                                                                                 | 13        |

# 1. Syntheses and Spectroscopic Data

## 1.1. Preparation of [(IBox-iPr<sub>2</sub>)PPh<sub>2</sub>][OTf] (1)

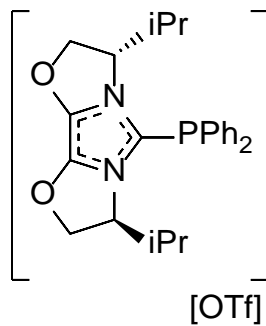

<sup>1</sup>H NMR (CD<sub>2</sub>Cl<sub>2</sub>)

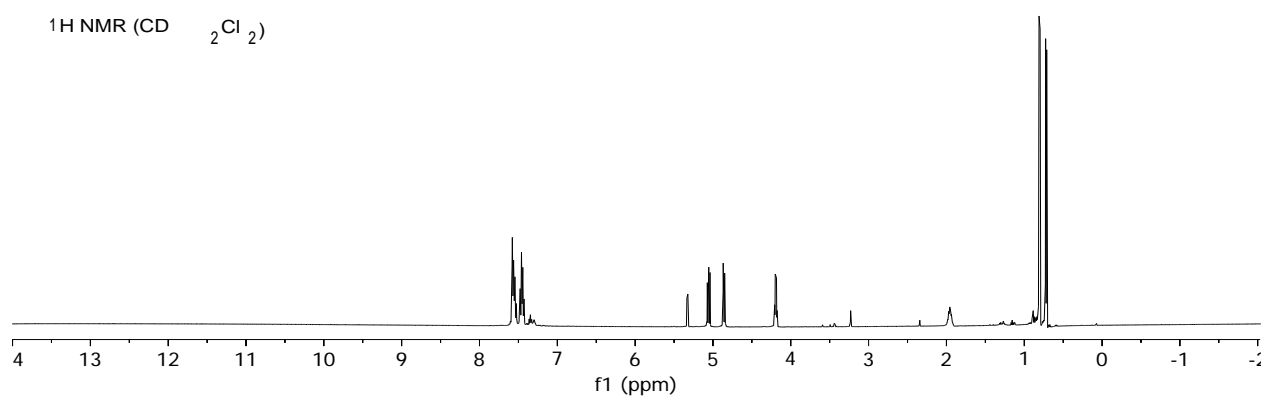

<sup>31</sup>P{<sup>1</sup>H} NMR (CD<sub>2</sub>Cl<sub>2</sub>)

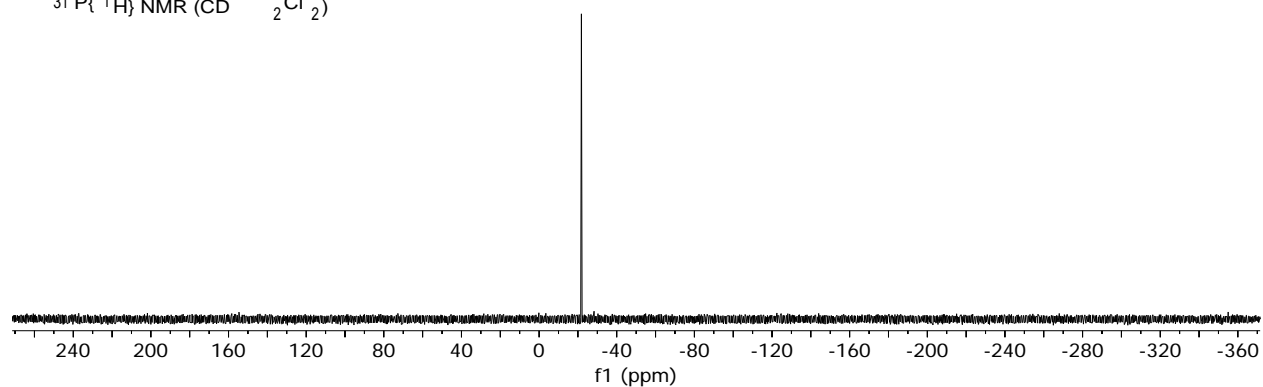

## 1.2. Preparation of [(cAAC)PPh<sub>2</sub>][OTf] (2)

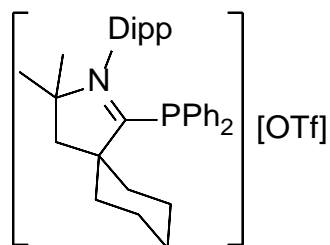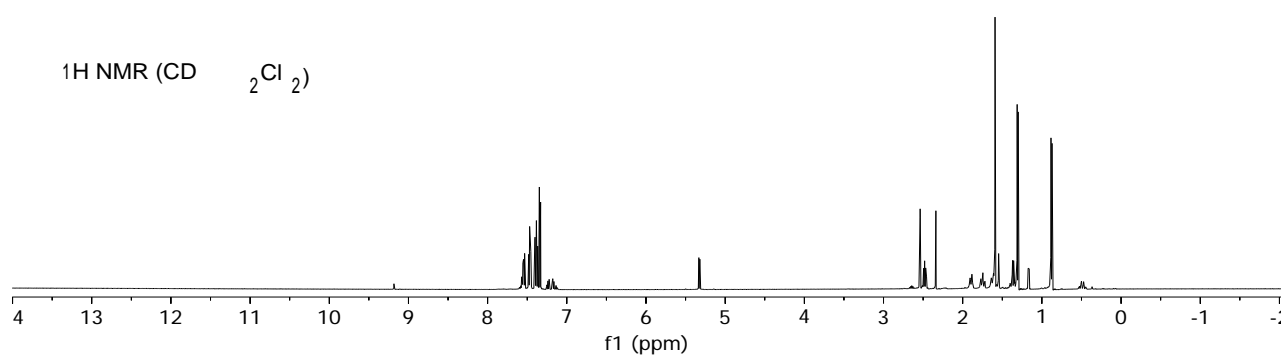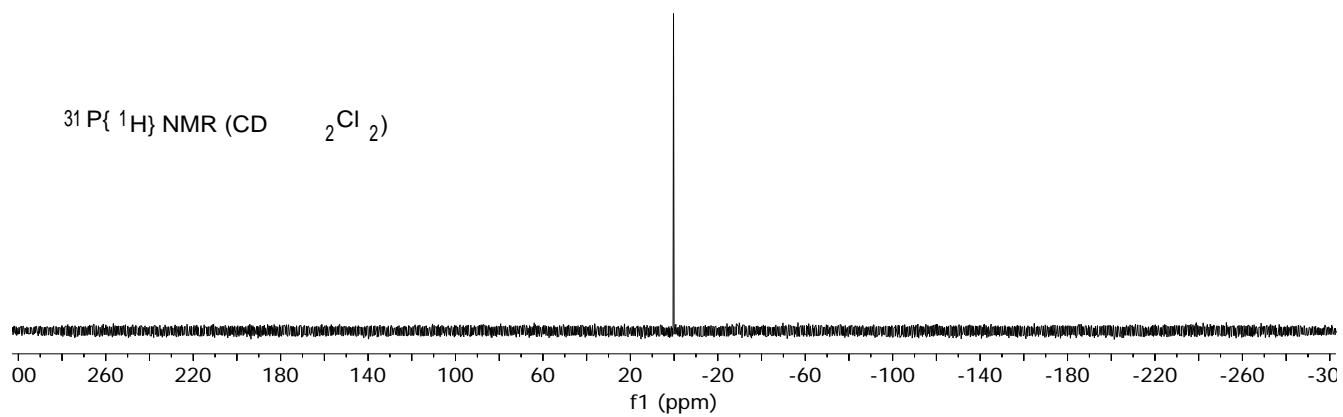

### 1.3. Preparation of $[(\text{TrippCH}_2\text{N}_2(\text{NMe})\text{C}_2\text{Ph})\text{PPh}_2]_2(\text{AgCl})_2][\text{Cl}]_2$ (3)

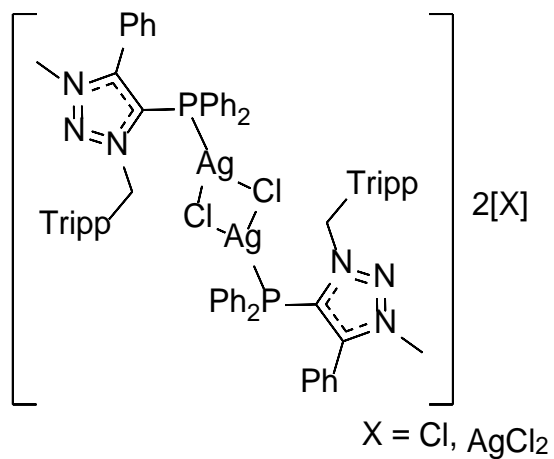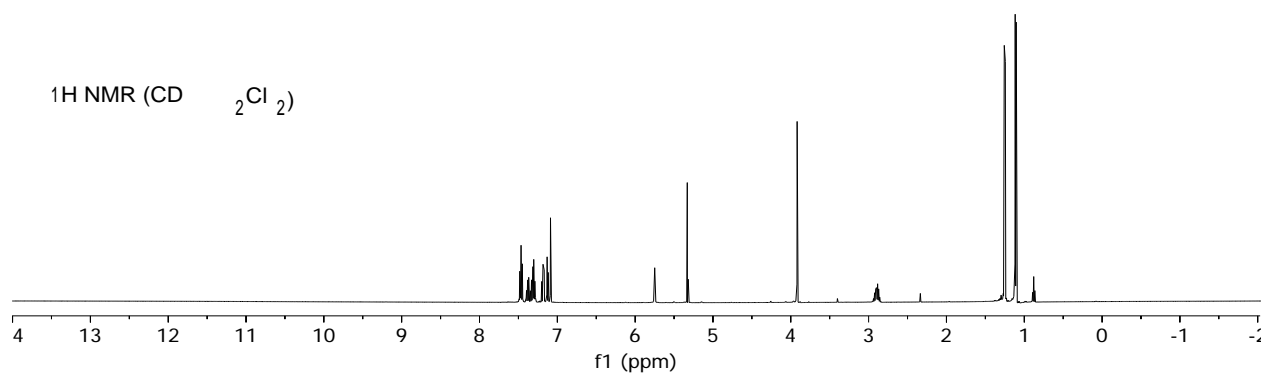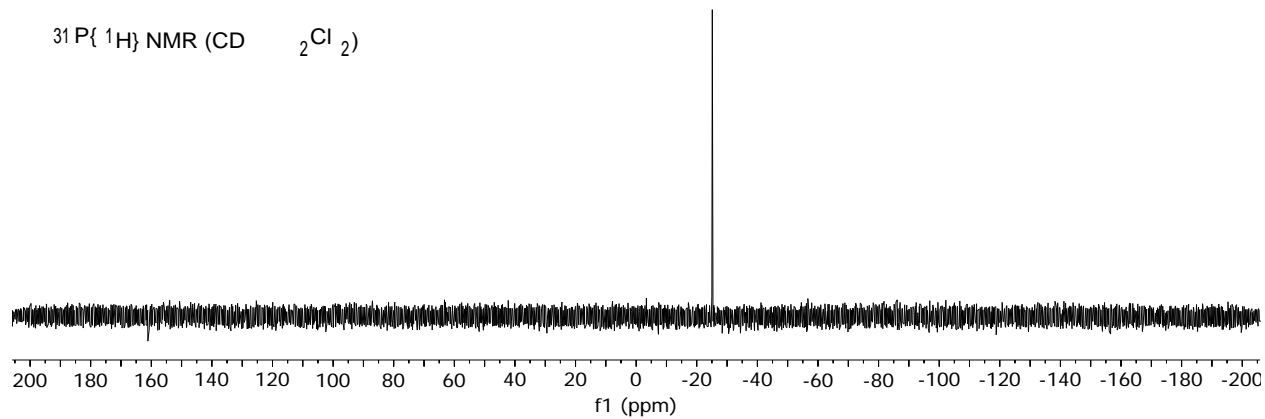

#### 1.4. Preparation of $[\text{CH}_2(\text{NC}_3\text{H}_2\text{NDipp})_2\text{PPh}][\text{OTf}]_2$ (**4a**)

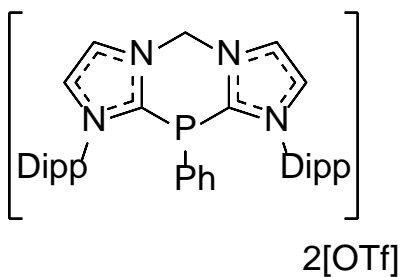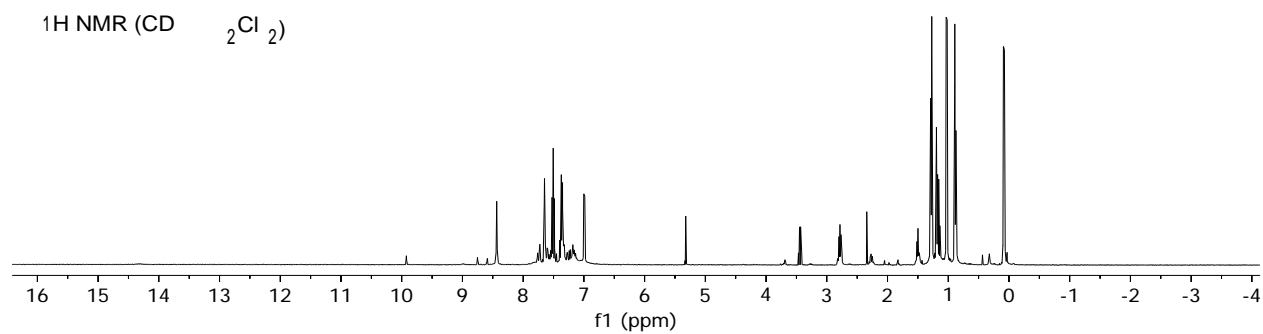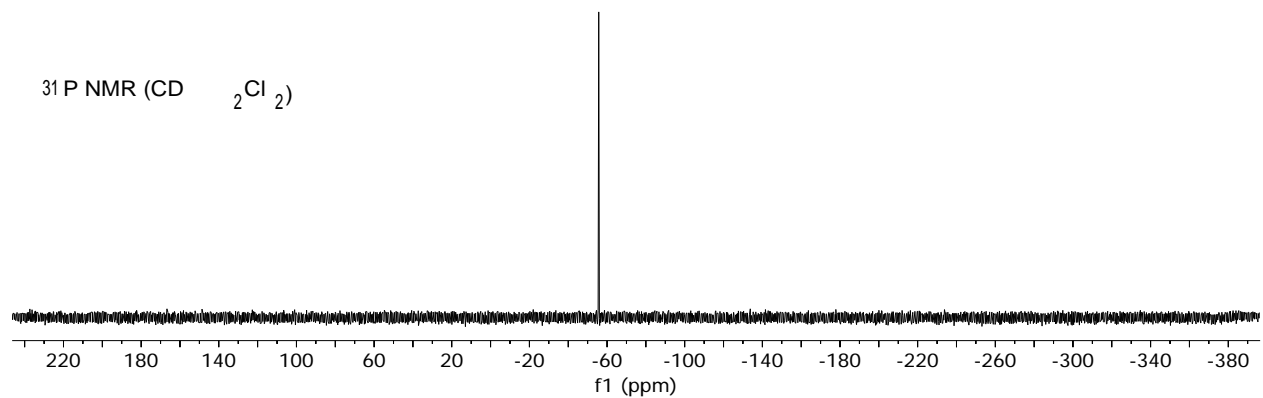

**1.5. Preparation of  $[\text{CH}_2(\text{NC}_3\text{H}_2\text{NDipp})_2\text{PPh}][\text{B}(\text{C}_6\text{F}_5)_4]_2$  (**4b**)**

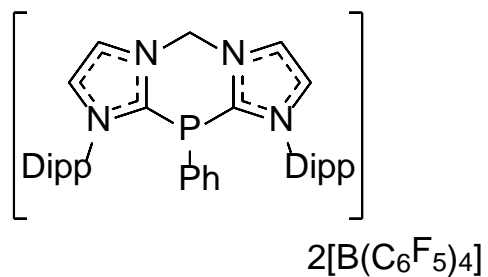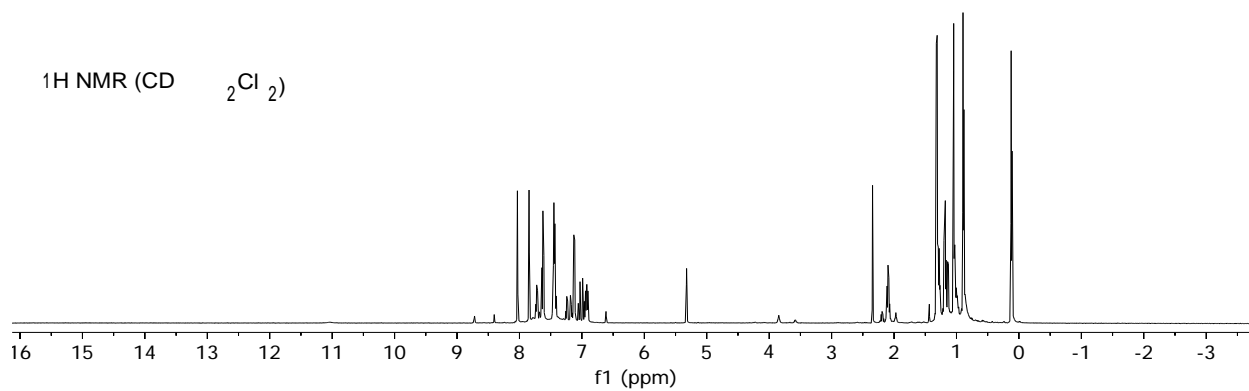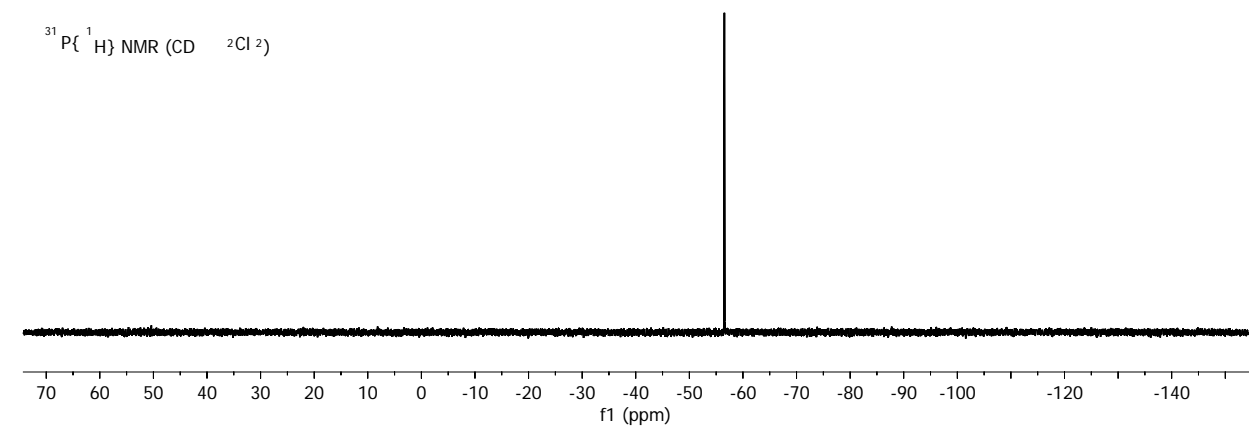

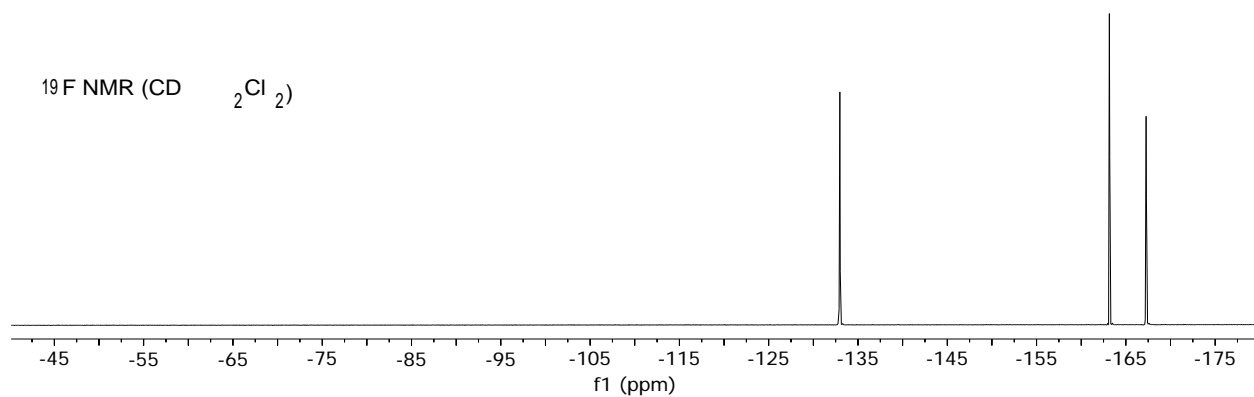

### 1.6. Preparation of $[(\text{IBox-iPr}_2)\text{PF}_2\text{Ph}_2][\text{OTf}]$ (5)

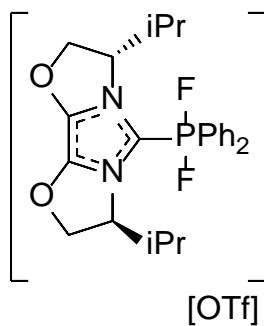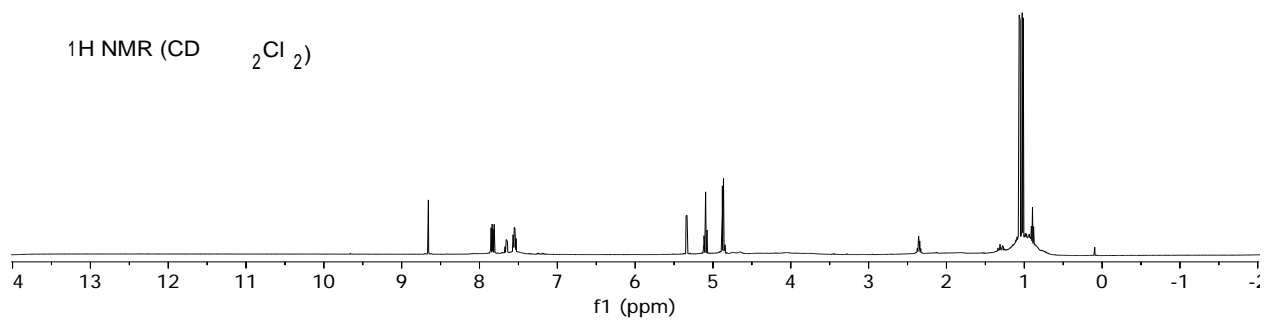

$^{19}\text{F}\{^1\text{H}\}$  NMR ( $\text{CD}_2\text{Cl}_2$ )

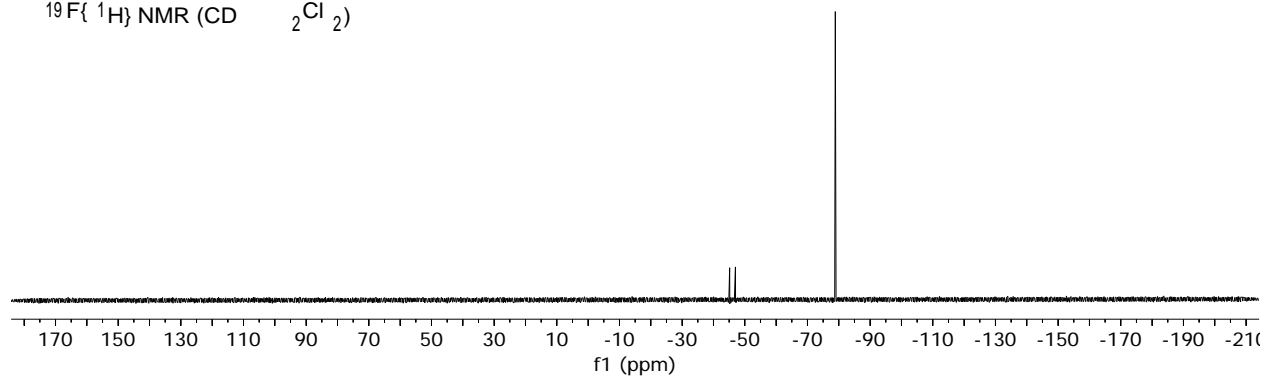

$^{31}\text{P}\{^1\text{H}\}$  NMR ( $\text{CD}_2\text{Cl}_2$ )

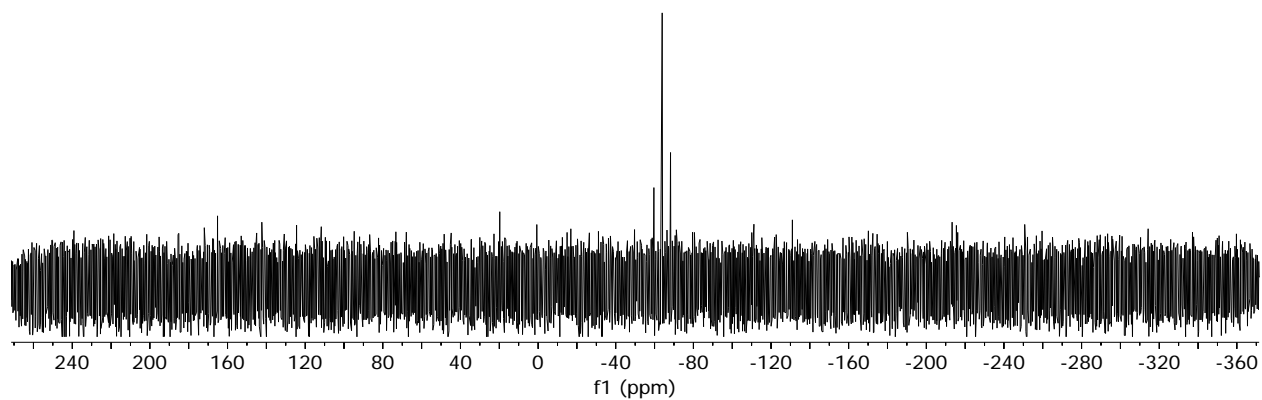

### 1.7. Preparation of $[(\text{cAAC})\text{PF}_2\text{Ph}_2][\text{OTf}]$ (6)

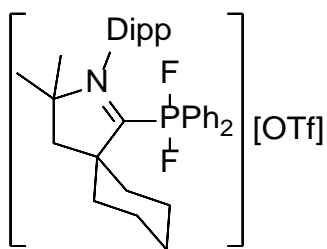



$^1\text{H NMR (CD}_2\text{Cl}_2)$

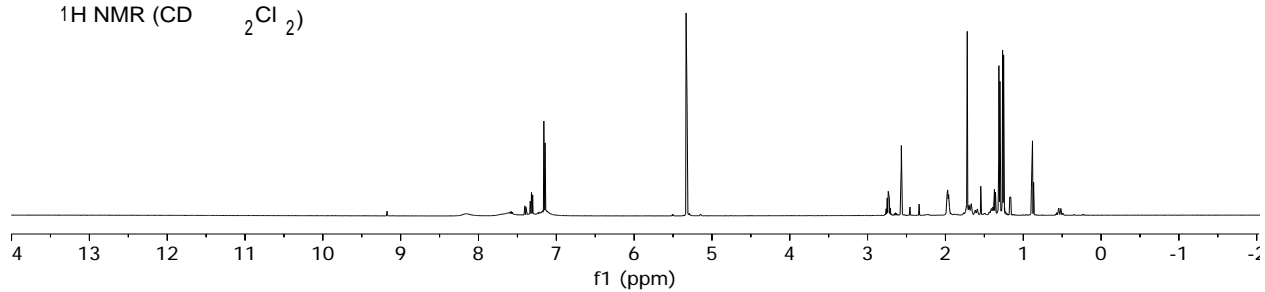

$^{19}\text{F}\{^1\text{H}\} \text{NMR (CD}_2\text{Cl}_2)$

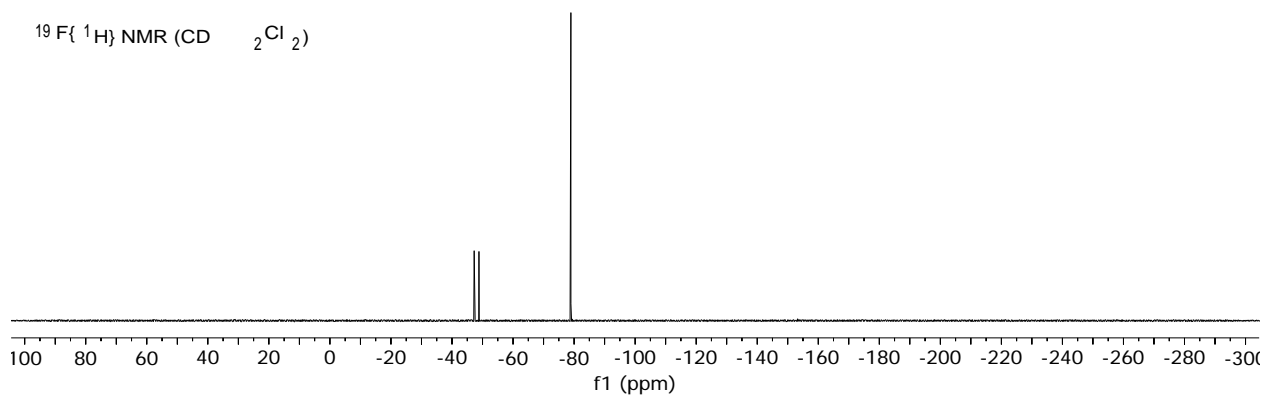

$^{31}\text{P}\{^1\text{H}\} \text{NMR (CD}_2\text{Cl}_2)$

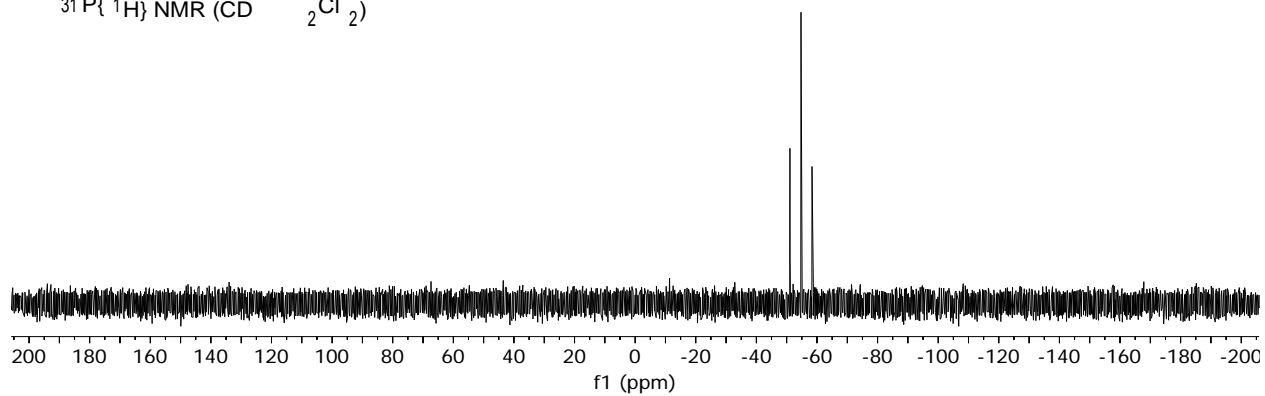

**1.8. Preparation of [(TrippCH<sub>2</sub>N<sub>2</sub>(NMe)C<sub>2</sub>Ph)PF<sub>2</sub>Ph<sub>2</sub>][Cl] (7)**

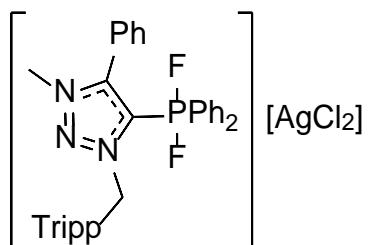

<sup>1</sup>H NMR (CD<sub>2</sub>Cl<sub>2</sub>)

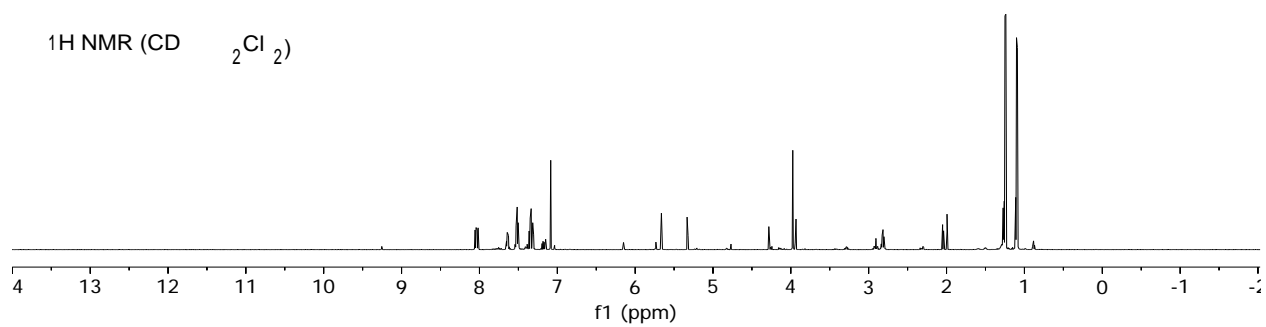

<sup>19</sup>F{<sup>1</sup>H} NMR (CD<sub>2</sub>Cl<sub>2</sub>)

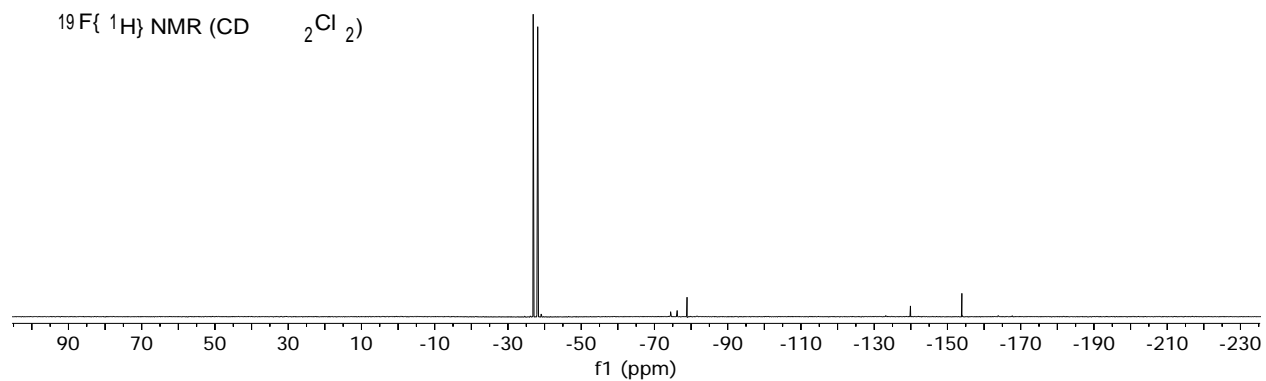

$^{31}\text{P}\{^1\text{H}\}$  NMR ( $\text{CD}_2\text{Cl}_2$ )

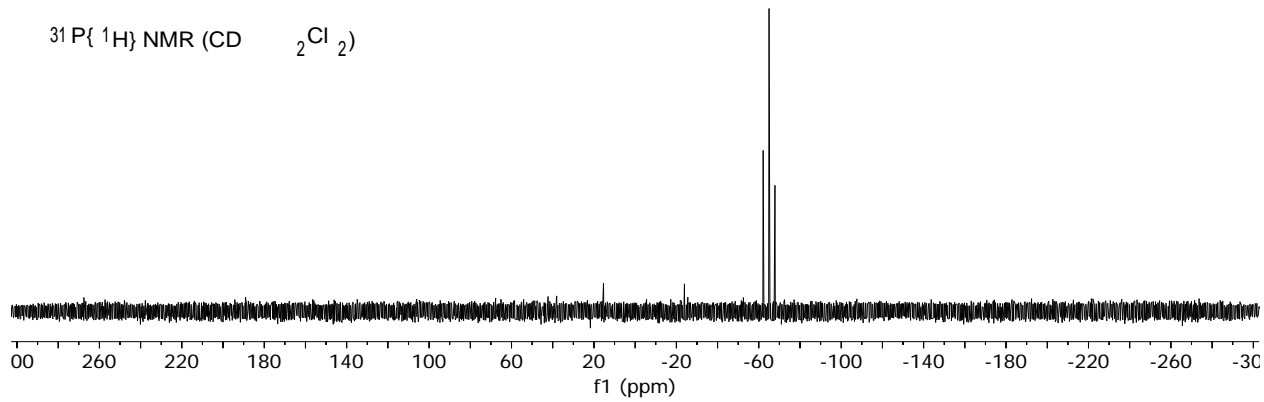

## 2. Crystallographic Details

**Table S1.** Crystallographic refinement parameters

|                                          | <b>1</b>                                                                        | <b>3</b>                                                                                                         | <b>4b</b>                                                                        | <b>7</b>                                                                          |
|------------------------------------------|---------------------------------------------------------------------------------|------------------------------------------------------------------------------------------------------------------|----------------------------------------------------------------------------------|-----------------------------------------------------------------------------------|
| formula                                  | C <sub>26</sub> H <sub>30</sub> F <sub>3</sub> N <sub>2</sub> O <sub>5</sub> PS | C <sub>81</sub> H <sub>103</sub> Ag <sub>3</sub> Cl <sub>5</sub> N <sub>6</sub> O <sub>0.50</sub> P <sub>2</sub> | C <sub>109</sub> H <sub>66</sub> B <sub>2</sub> F <sub>47</sub> N <sub>4</sub> P | C <sub>39</sub> H <sub>46</sub> AgCl <sub>6</sub> F <sub>2</sub> N <sub>3</sub> P |
| M <sub>r</sub> [g mol <sup>-1</sup> ]    | 570.55                                                                          | 1731.49                                                                                                          | 2377.25                                                                          | 946.33                                                                            |
| colour, habit                            | colourless, needle                                                              | colourless, block                                                                                                | colourless, needle                                                               | colourless, block                                                                 |
| crystal system                           | orthorhombic                                                                    | monoclinic                                                                                                       | triclinic                                                                        | monoclinic                                                                        |
| Space group                              | <i>P2<sub>1</sub>2<sub>1</sub>2<sub>1</sub></i>                                 | <i>C2/c</i>                                                                                                      | <i>P1</i>                                                                        | <i>P2<sub>1</sub>/c</i>                                                           |
| a [Å]                                    | 10.4215(11)                                                                     | 20.2421(7)                                                                                                       | 15.5736(4)                                                                       | 22.377(4)                                                                         |
| b [Å]                                    | 10.4310(13)                                                                     | 25.5536(9)                                                                                                       | 17.4980(5)                                                                       | 10.6024(18)                                                                       |
| c [Å]                                    | 24.812(3)                                                                       | 31.5604(11)                                                                                                      | 18.9275(4)                                                                       | 18.089(3)                                                                         |
| α [°]                                    | 90                                                                              | 90                                                                                                               | 83.610(2)                                                                        | 90                                                                                |
| β [°]                                    | 90                                                                              | 94.9190(10)                                                                                                      | 89.0867(19)                                                                      | 91.717(7)                                                                         |
| γ [°]                                    | 90                                                                              | 90                                                                                                               | 73.915(3)                                                                        | 90                                                                                |
| V [Å <sup>3</sup> ]                      | 2697.2(6)                                                                       | 16264.8(10)                                                                                                      | 4924.5(2)                                                                        | 4289.6(12)                                                                        |
| Z                                        | 4                                                                               | 8                                                                                                                | 2                                                                                | 4                                                                                 |
| T [K]                                    | 150(2)                                                                          | 150(2)                                                                                                           | 150(2)                                                                           | 150(2)                                                                            |
| Crystal size [mm]                        | 0.48 x 0.08 x 0.08                                                              | 0.07 x 0.06 x 0.04                                                                                               | 0.54 x 0.08 x 0.08                                                               | 0.27 x 0.12 x 0.06                                                                |
| ρ <sub>c</sub> [g cm <sup>-3</sup> ]     | 1.405                                                                           | 1.414                                                                                                            | 1.603                                                                            | 1.465                                                                             |
| F(000)                                   | 1192                                                                            | 7128                                                                                                             | 2392                                                                             | 1932                                                                              |
| Wavelength (Å)                           | 0.71073                                                                         | 0.71073                                                                                                          | 1.54184                                                                          | 0.71073                                                                           |
| θ <sub>min</sub> [°]                     | 1.641                                                                           | 2.57                                                                                                             | 2.35                                                                             | 2.42                                                                              |
| θ <sub>max</sub> [°]                     | 27.608                                                                          | 27.46                                                                                                            | 67.49                                                                            | 27.56                                                                             |
| μ [mm <sup>-1</sup> ]                    | 0.240                                                                           | 0.965                                                                                                            | 1.539                                                                            | 0.921                                                                             |
| reflections collected                    | 24768                                                                           | 73113                                                                                                            | 34478                                                                            | 36624                                                                             |
| reflections unique                       | 6250                                                                            | 18666                                                                                                            | 17749                                                                            | 9846                                                                              |
| R <sub>int</sub>                         | 0.0346                                                                          | 0.0340                                                                                                           | 0.0244                                                                           | 0.0386                                                                            |
| reflection obs.<br>[F > 2σ(F)]           | 5640                                                                            | 14516                                                                                                            | 14663                                                                            | 7811                                                                              |
| residual density<br>[e Å <sup>-3</sup> ] | 0.212, -0.298                                                                   | 5.526, -1.192                                                                                                    | 0.756, -0.792                                                                    | 1.734, -1.253                                                                     |
| parameters                               | 347                                                                             | 951                                                                                                              | 1465                                                                             | 486                                                                               |
| GOF                                      | 1.030                                                                           | 1.027                                                                                                            | 1.062                                                                            | 1.045                                                                             |
| R <sub>1</sub> [I > 2σ(I)]               | 0.0297                                                                          | 0.0512                                                                                                           | 0.0746                                                                           | 0.0624                                                                            |
| wR <sub>2</sub> (all data)               | 0.0690                                                                          | 0.1465                                                                                                           | 0.1941                                                                           | 0.1637                                                                            |

**Table S2.** Selected bond lengths and angles of cationic phosphines.

|                      | P-C <sub>cation</sub> (Å) | P-C <sub>phenyl</sub> (Å)              | ∠C-P-C (°)                                                  |
|----------------------|---------------------------|----------------------------------------|-------------------------------------------------------------|
| <b>1</b>             | 1.826(2)                  | 1.824(2)<br>1.819(2)                   | 100.89(7)<br>104.26(7)<br>103.14(7)                         |
| <b>3<sup>†</sup></b> | 1.831(4)/1.825(4)         | 1.822(4)/1.819(4)<br>1.825(4)/1.823(4) | 100.9(2)/100.9(2)<br>106.1(2)/104.1(2)<br>102.8(2)/103.7(2) |
| <b>4b</b>            | 1.824(3)<br>1.830(3)      | 1.821(3)                               | 91.9(2)<br>105.7(2)<br>101.0(2)                             |

<sup>†</sup> Values are given for both half-dimers in the asymmetric unit

### 3. Computations Studies

**Table S3.** Optimized Cartesian coordinates (Å) of the cation of **1**.

| Center Number | Atomic Number | Atomic Type | Coordinates (Angstroms) |          |           |
|---------------|---------------|-------------|-------------------------|----------|-----------|
|               |               |             | X                       | Y        | Z         |
| 1             | 15            | 0           | 7.837053                | 4.402054 | 4.618361  |
| 2             | 6             | 0           | 7.950339                | 8.270728 | 6.725901  |
| 3             | 1             | 0           | 8.504904                | 8.197292 | 7.682257  |
| 4             | 1             | 0           | 8.682274                | 8.083327 | 5.913471  |
| 5             | 1             | 0           | 7.586060                | 9.314879 | 6.627077  |
| 6             | 6             | 0           | 7.619161                | 2.619010 | 2.488939  |
| 7             | 1             | 0           | 6.537148                | 2.724764 | 2.671997  |
| 8             | 6             | 0           | 6.031871                | 7.251077 | 5.356633  |
| 9             | 1             | 0           | 5.256716                | 6.457952 | 5.369883  |
| 10            | 6             | 0           | 8.735848                | 5.448216 | 0.556632  |
| 11            | 1             | 0           | 8.364709                | 4.521461 | 1.039062  |
| 12            | 6             | 0           | 10.379288               | 2.315717 | 2.041853  |
| 13            | 1             | 0           | 11.460274               | 2.182934 | 1.878021  |
| 14            | 8             | 0           | 6.386710                | 9.233168 | 3.996614  |
| 15            | 8             | 0           | 8.792254                | 8.587864 | 1.619089  |
| 16            | 6             | 0           | 9.454859                | 1.646379 | 1.218474  |
| 17            | 1             | 0           | 9.812629                | 0.995092 | 0.406021  |
| 18            | 6             | 0           | 8.074760                | 1.791828 | 1.447880  |
| 19            | 1             | 0           | 7.349220                | 1.251728 | 0.820075  |
| 20            | 6             | 0           | 8.544443                | 3.322089 | 3.295314  |
| 21            | 6             | 0           | 7.760194                | 6.034302 | 3.765395  |
| 22            | 7             | 0           | 6.929175                | 7.029293 | 4.201122  |
| 23            | 6             | 0           | 6.799439                | 7.254856 | 6.703203  |
| 24            | 1             | 0           | 7.238046                | 6.236148 | 6.799415  |
| 25            | 6             | 0           | 5.816893                | 7.450190 | 7.868918  |
| 26            | 1             | 0           | 4.999022                | 6.700136 | 7.852094  |
| 27            | 1             | 0           | 6.347866                | 7.347028 | 8.836070  |
| 28            | 1             | 0           | 5.356514                | 8.461148 | 7.858555  |
| 29            | 6             | 0           | 7.535904                | 6.181968 | -0.061621 |
| 30            | 1             | 0           | 7.051163                | 5.541108 | -0.824836 |
| 31            | 1             | 0           | 6.764011                | 6.429016 | 0.697176  |
| 32            | 1             | 0           | 7.833441                | 7.127349 | -0.561421 |
| 33            | 6             | 0           | 9.776867                | 5.031548 | -0.494695 |
| 34            | 1             | 0           | 10.627140               | 4.487427 | -0.034103 |
| 35            | 1             | 0           | 9.312803                | 4.352234 | -1.237219 |

|    |   |   |           |          |           |
|----|---|---|-----------|----------|-----------|
| 36 | 1 | 0 | 10.179572 | 5.901445 | -1.056413 |
| 37 | 6 | 0 | 9.424367  | 6.255910 | 1.684011  |
| 38 | 1 | 0 | 10.257987 | 5.665894 | 2.112155  |
| 39 | 7 | 0 | 8.485157  | 6.637113 | 2.769858  |
| 40 | 6 | 0 | 9.929444  | 3.146145 | 3.082388  |
| 41 | 1 | 0 | 10.658107 | 3.653680 | 3.734740  |
| 42 | 6 | 0 | 9.268762  | 4.706814 | 5.753652  |
| 43 | 6 | 0 | 9.329639  | 3.885431 | 6.903324  |
| 44 | 1 | 0 | 8.554374  | 3.120414 | 7.075411  |
| 45 | 6 | 0 | 10.373083 | 4.041305 | 7.831045  |
| 46 | 1 | 0 | 10.414097 | 3.393708 | 8.720608  |
| 47 | 6 | 0 | 11.354549 | 5.028241 | 7.629987  |
| 48 | 1 | 0 | 12.166360 | 5.156111 | 8.362718  |
| 49 | 6 | 0 | 11.296114 | 5.855152 | 6.493861  |
| 50 | 1 | 0 | 12.062170 | 6.630378 | 6.335528  |
| 51 | 6 | 0 | 10.260837 | 5.694910 | 5.557253  |
| 52 | 1 | 0 | 10.228998 | 6.350590 | 4.672927  |
| 53 | 6 | 0 | 5.419686  | 8.619422 | 4.912447  |
| 54 | 1 | 0 | 4.464592  | 8.482244 | 4.363204  |
| 55 | 1 | 0 | 5.264703  | 9.320502 | 5.752743  |
| 56 | 6 | 0 | 7.133788  | 8.224259 | 3.533072  |
| 57 | 6 | 0 | 8.124578  | 7.970261 | 2.600864  |
| 58 | 6 | 0 | 9.897260  | 7.686100 | 1.283652  |
| 59 | 1 | 0 | 10.101025 | 7.792534 | 0.202930  |
| 60 | 1 | 0 | 10.790750 | 8.003128 | 1.863427  |

**Table S4.** Optimized Cartesian coordinates (Å) of the cation of **2**.

| Center<br>Number | Atomic<br>Number | Atomic<br>Type | Coordinates (Angstroms) |           |           |
|------------------|------------------|----------------|-------------------------|-----------|-----------|
|                  |                  |                | X                       | Y         | Z         |
| 1                | 15               | 0              | 16.405374               | 5.287958  | -3.665473 |
| 2                | 6                | 0              | 17.222907               | 5.647506  | -5.273654 |
| 3                | 6                | 0              | 16.874114               | 6.854716  | -5.919457 |
| 4                | 1                | 0              | 16.169016               | 7.552955  | -5.440412 |
| 5                | 6                | 0              | 17.432643               | 7.171089  | -7.169427 |
| 6                | 1                | 0              | 17.155857               | 8.113022  | -7.667721 |
| 7                | 6                | 0              | 18.345900               | 6.291806  | -7.777812 |
| 8                | 1                | 0              | 18.787372               | 6.545461  | -8.754048 |
| 9                | 6                | 0              | 18.692177               | 5.085304  | -7.141795 |
| 10               | 1                | 0              | 19.401696               | 4.391799  | -7.619398 |
| 11               | 6                | 0              | 18.129320               | 4.759563  | -5.897975 |
| 12               | 1                | 0              | 18.389778               | 3.806393  | -5.412682 |
| 13               | 6                | 0              | 17.756897               | 4.536776  | -2.677725 |
| 14               | 6                | 0              | 16.670592               | 2.399338  | -1.939712 |
| 15               | 6                | 0              | 15.779857               | 2.436323  | -0.835263 |
| 16               | 6                | 0              | 14.784097               | 1.440702  | -0.778909 |
| 17               | 1                | 0              | 14.074104               | 1.436826  | 0.061903  |
| 18               | 6                | 0              | 14.676345               | 0.466822  | -1.778139 |
| 19               | 1                | 0              | 13.880945               | -0.292161 | -1.722352 |
| 20               | 6                | 0              | 15.582636               | 0.448420  | -2.848443 |
| 21               | 1                | 0              | 15.489476               | -0.327765 | -3.621277 |
| 22               | 6                | 0              | 16.614340               | 1.400711  | -2.949517 |
| 23               | 6                | 0              | 15.098598               | 4.065697  | -4.096512 |
| 24               | 6                | 0              | 14.991991               | 3.495881  | -5.384743 |
| 25               | 1                | 0              | 15.755760               | 3.697949  | -6.149593 |
| 26               | 6                | 0              | 13.900758               | 2.667329  | -5.696637 |
| 27               | 1                | 0              | 13.824449               | 2.228553  | -6.703740 |
| 28               | 6                | 0              | 12.915154               | 2.396608  | -4.732531 |
| 29               | 1                | 0              | 12.065416               | 1.741961  | -4.980672 |
| 30               | 6                | 0              | 13.004745               | 2.983019  | -3.457223 |
| 31               | 1                | 0              | 12.229000               | 2.790370  | -2.700595 |
| 32               | 6                | 0              | 14.075426               | 3.833566  | -3.150151 |
| 33               | 1                | 0              | 14.121804               | 4.315232  | -2.163197 |

|    |   |   |           |           |           |
|----|---|---|-----------|-----------|-----------|
| 34 | 6 | 0 | 15.888643 | 3.465857  | 0.291024  |
| 35 | 6 | 0 | 16.491134 | 2.805650  | 1.553030  |
| 36 | 6 | 0 | 14.551190 | 4.151648  | 0.633946  |
| 37 | 1 | 0 | 16.577068 | 4.271068  | -0.042877 |
| 38 | 1 | 0 | 17.450785 | 2.291406  | 1.340043  |
| 39 | 1 | 0 | 16.668140 | 3.559633  | 2.347666  |
| 40 | 1 | 0 | 15.797607 | 2.040646  | 1.960285  |
| 41 | 1 | 0 | 14.113883 | 4.676680  | -0.239022 |
| 42 | 1 | 0 | 13.797847 | 3.428354  | 1.007377  |
| 43 | 1 | 0 | 14.703699 | 4.905236  | 1.433156  |
| 44 | 6 | 0 | 17.662798 | 1.305833  | -4.054972 |
| 45 | 6 | 0 | 17.133304 | 0.722974  | -5.376368 |
| 46 | 6 | 0 | 18.879966 | 0.482803  | -3.572662 |
| 47 | 1 | 0 | 18.010278 | 2.340003  | -4.264216 |
| 48 | 1 | 0 | 16.193903 | 1.212801  | -5.692441 |
| 49 | 1 | 0 | 17.886596 | 0.857026  | -6.179282 |
| 50 | 1 | 0 | 16.941888 | -0.367125 | -5.294737 |
| 51 | 1 | 0 | 19.322084 | 0.882092  | -2.639719 |
| 52 | 1 | 0 | 18.577739 | -0.566060 | -3.372713 |
| 53 | 1 | 0 | 19.676800 | 0.470257  | -4.344675 |
| 54 | 7 | 0 | 17.722200 | 3.401246  | -1.992203 |
| 55 | 6 | 0 | 19.944130 | 4.221203  | -1.704447 |
| 56 | 6 | 0 | 20.695573 | 3.573832  | -2.887923 |
| 57 | 1 | 0 | 21.462571 | 4.259480  | -3.297640 |
| 58 | 1 | 0 | 21.218744 | 2.655742  | -2.552562 |
| 59 | 1 | 0 | 20.015486 | 3.290592  | -3.716557 |
| 60 | 6 | 0 | 20.960409 | 4.573843  | -0.605195 |
| 61 | 1 | 0 | 21.507726 | 3.654676  | -0.308173 |
| 62 | 1 | 0 | 21.712652 | 5.304522  | -0.956588 |
| 63 | 1 | 0 | 20.477311 | 4.977344  | 0.305206  |
| 64 | 6 | 0 | 18.915372 | 3.229420  | -1.132099 |
| 65 | 1 | 0 | 19.232904 | 2.169252  | -1.161389 |
| 66 | 1 | 0 | 18.637393 | 3.467018  | -0.084044 |
| 67 | 6 | 0 | 18.978829 | 5.378990  | -2.223866 |
| 68 | 6 | 0 | 18.425641 | 6.304651  | -1.067574 |
| 69 | 6 | 0 | 19.563664 | 6.299319  | -3.324118 |
| 70 | 6 | 0 | 19.386443 | 7.416117  | -0.594261 |
| 71 | 1 | 0 | 18.101324 | 5.687318  | -0.202416 |
| 72 | 1 | 0 | 17.504176 | 6.787140  | -1.457969 |
| 73 | 6 | 0 | 20.603288 | 7.304119  | -2.808418 |
| 74 | 1 | 0 | 19.957255 | 5.703047  | -4.168282 |
| 75 | 1 | 0 | 18.728152 | 6.891851  | -3.752326 |
| 76 | 6 | 0 | 19.974216 | 8.228471  | -1.756411 |
| 77 | 1 | 0 | 20.213031 | 6.992185  | 0.009270  |
| 78 | 1 | 0 | 18.819624 | 8.078103  | 0.094638  |
| 79 | 1 | 0 | 20.982504 | 7.896107  | -3.667368 |
| 80 | 1 | 0 | 21.487044 | 6.779424  | -2.385400 |
| 81 | 1 | 0 | 20.716344 | 8.959689  | -1.373997 |
| 82 | 1 | 0 | 19.166974 | 8.823875  | -2.240967 |

**Table S5.** Optimized Cartesian coordinates (Å) of the cation of **3**.

| Center Number | Atomic Number | Atomic Type | Coordinates (Angstroms) |          |           |
|---------------|---------------|-------------|-------------------------|----------|-----------|
|               |               |             | X                       | Y        | Z         |
| 1             | 15            | 0           | 16.213894               | 5.678240 | -3.324080 |
| 2             | 7             | 0           | 18.738404               | 5.337032 | -2.131594 |
| 3             | 7             | 0           | 19.568014               | 4.544637 | -1.477431 |
| 4             | 7             | 0           | 18.991434               | 3.353869 | -1.509390 |
| 5             | 6             | 0           | 16.976162               | 6.103551 | -4.954862 |
| 6             | 6             | 0           | 16.763119               | 7.411069 | -5.446620 |
| 7             | 1             | 0           | 16.165654               | 8.127403 | -4.859251 |
| 8             | 6             | 0           | 17.315868               | 7.802480 | -6.678891 |
| 9             | 1             | 0           | 17.148394               | 8.824117 | -7.053465 |

|    |   |   |           |           |           |
|----|---|---|-----------|-----------|-----------|
| 10 | 6 | 0 | 18.078702 | 6.891176  | -7.429203 |
| 11 | 1 | 0 | 18.510882 | 7.198272  | -8.394130 |
| 12 | 6 | 0 | 18.295533 | 5.587456  | -6.945211 |
| 13 | 1 | 0 | 18.897714 | 4.875025  | -7.530209 |
| 14 | 6 | 0 | 17.754416 | 5.196133  | -5.710943 |
| 15 | 1 | 0 | 17.951155 | 4.183264  | -5.325614 |
| 16 | 6 | 0 | 17.610063 | 4.688639  | -2.601816 |
| 17 | 6 | 0 | 19.065025 | 6.787560  | -2.272525 |
| 18 | 1 | 0 | 18.689566 | 7.076893  | -3.271799 |
| 19 | 1 | 0 | 18.441270 | 7.316200  | -1.525291 |
| 20 | 6 | 0 | 20.537792 | 7.078814  | -2.123896 |
| 21 | 6 | 0 | 21.393340 | 6.980497  | -3.259480 |
| 22 | 6 | 0 | 20.898359 | 6.469297  | -4.613895 |
| 23 | 1 | 0 | 19.802516 | 6.636251  | -4.681609 |
| 24 | 6 | 0 | 21.515738 | 7.201331  | -5.818851 |
| 25 | 1 | 0 | 22.594301 | 6.970184  | -5.941456 |
| 26 | 1 | 0 | 21.006881 | 6.886449  | -6.752891 |
| 27 | 1 | 0 | 21.410039 | 8.300873  | -5.723043 |
| 28 | 6 | 0 | 21.130554 | 4.944897  | -4.720197 |
| 29 | 1 | 0 | 20.625537 | 4.393747  | -3.900677 |
| 30 | 1 | 0 | 20.751852 | 4.552077  | -5.686471 |
| 31 | 1 | 0 | 22.214153 | 4.711757  | -4.655752 |
| 32 | 6 | 0 | 22.754573 | 7.295195  | -3.099929 |
| 33 | 1 | 0 | 23.423597 | 7.221682  | -3.970605 |
| 34 | 6 | 0 | 23.292002 | 7.699221  | -1.862696 |
| 35 | 6 | 0 | 22.427661 | 7.760609  | -0.754805 |
| 36 | 1 | 0 | 22.844704 | 8.062761  | 0.218375  |
| 37 | 6 | 0 | 21.059535 | 7.444488  | -0.852451 |
| 38 | 6 | 0 | 20.166910 | 7.538273  | 0.388037  |
| 39 | 1 | 0 | 19.311340 | 6.840924  | 0.246522  |
| 40 | 6 | 0 | 20.866803 | 7.086021  | 1.683351  |
| 41 | 1 | 0 | 21.658819 | 7.796983  | 1.997328  |
| 42 | 1 | 0 | 20.135187 | 7.033522  | 2.515710  |
| 43 | 1 | 0 | 21.333910 | 6.086951  | 1.565136  |
| 44 | 6 | 0 | 19.599709 | 8.967842  | 0.536024  |
| 45 | 1 | 0 | 19.046214 | 9.292203  | -0.370140 |
| 46 | 1 | 0 | 18.913518 | 9.039558  | 1.405564  |
| 47 | 1 | 0 | 20.426103 | 9.692901  | 0.689611  |
| 48 | 6 | 0 | 24.769944 | 8.046973  | -1.726704 |
| 49 | 1 | 0 | 24.938992 | 8.342952  | -0.667394 |
| 50 | 6 | 0 | 25.665052 | 6.824477  | -2.018186 |
| 51 | 1 | 0 | 25.562762 | 6.492600  | -3.073440 |
| 52 | 1 | 0 | 26.733670 | 7.072151  | -1.850109 |
| 53 | 1 | 0 | 25.402859 | 5.966089  | -1.366089 |
| 54 | 6 | 0 | 25.151310 | 9.249527  | -2.614688 |
| 55 | 1 | 0 | 24.518446 | 10.133233 | -2.393708 |
| 56 | 1 | 0 | 26.211453 | 9.534839  | -2.452921 |
| 57 | 1 | 0 | 25.032249 | 9.009319  | -3.692678 |
| 58 | 6 | 0 | 19.675437 | 2.220806  | -0.882543 |
| 59 | 1 | 0 | 20.762314 | 2.413822  | -0.922385 |
| 60 | 1 | 0 | 19.351104 | 2.114922  | 0.170751  |
| 61 | 1 | 0 | 19.420088 | 1.302135  | -1.441537 |
| 62 | 6 | 0 | 17.784360 | 3.354534  | -2.187184 |
| 63 | 6 | 0 | 16.968278 | 2.142231  | -2.366102 |
| 64 | 6 | 0 | 16.502608 | 1.426733  | -1.238009 |
| 65 | 1 | 0 | 16.750244 | 1.776484  | -0.223438 |
| 66 | 6 | 0 | 15.690068 | 0.296004  | -1.410210 |
| 67 | 1 | 0 | 15.321785 | -0.252000 | -0.529448 |
| 68 | 6 | 0 | 15.335261 | -0.124372 | -2.704158 |
| 69 | 1 | 0 | 14.689533 | -1.006035 | -2.837250 |
| 70 | 6 | 0 | 15.801198 | 0.580429  | -3.828602 |
| 71 | 1 | 0 | 15.520181 | 0.256333  | -4.841610 |
| 72 | 6 | 0 | 16.619650 | 1.705981  | -3.664070 |
| 73 | 1 | 0 | 16.977821 | 2.262247  | -4.541800 |
| 74 | 6 | 0 | 14.968143 | 4.375275  | -3.712318 |
| 75 | 6 | 0 | 14.625402 | 4.007182  | -5.031090 |
| 76 | 1 | 0 | 15.148255 | 4.457275  | -5.888672 |
| 77 | 6 | 0 | 13.611017 | 3.059668  | -5.254026 |
| 78 | 1 | 0 | 13.344272 | 2.782091  | -6.285811 |
| 79 | 6 | 0 | 12.943413 | 2.466743  | -4.169177 |



|    |   |   |           |          |           |
|----|---|---|-----------|----------|-----------|
| 80 | 1 | 0 | 12.155155 | 1.719131 | -4.348005 |
| 81 | 6 | 0 | 13.273678 | 2.840151 | -2.853150 |
| 82 | 1 | 0 | 12.748387 | 2.384880 | -1.999638 |
| 83 | 6 | 0 | 14.265146 | 3.805105 | -2.624898 |
| 84 | 1 | 0 | 14.503544 | 4.105760 | -1.591190 |

**Table S6.** Optimized Cartesian coordinates (Å) of the cation of **4**.

| Center Number | Atomic Number | Atomic Type | Coordinates (Angstroms) |           |           |
|---------------|---------------|-------------|-------------------------|-----------|-----------|
|               |               |             | X                       | Y         | Z         |
| 1             | 15            | 0           | 14.420703               | 5.931659  | 14.252389 |
| 2             | 7             | 0           | 14.039217               | 8.516744  | 15.338838 |
| 3             | 7             | 0           | 14.043856               | 8.606445  | 13.157712 |
| 4             | 7             | 0           | 13.957163               | 6.836387  | 11.525580 |
| 5             | 7             | 0           | 13.974261               | 4.665378  | 11.769870 |
| 6             | 6             | 0           | 14.224701               | 7.770220  | 14.223642 |
| 7             | 6             | 0           | 13.758189               | 9.827218  | 14.988231 |
| 8             | 1             | 0           | 13.558752               | 10.594672 | 15.743342 |
| 9             | 6             | 0           | 13.756167               | 9.890758  | 13.613213 |
| 10            | 1             | 0           | 13.573889               | 10.730970 | 12.933257 |
| 11            | 6             | 0           | 14.050981               | 7.951211  | 16.681042 |
| 12            | 6             | 0           | 15.292253               | 7.890373  | 17.367923 |
| 13            | 6             | 0           | 15.268526               | 7.282728  | 18.638113 |
| 14            | 1             | 0           | 16.198360               | 7.209371  | 19.220127 |
| 15            | 6             | 0           | 14.073900               | 6.781386  | 19.180498 |
| 16            | 1             | 0           | 14.084104               | 6.313176  | 20.176899 |
| 17            | 6             | 0           | 12.865842               | 6.886998  | 18.476620 |
| 18            | 1             | 0           | 11.938467               | 6.503688  | 18.928671 |
| 19            | 6             | 0           | 12.817373               | 7.484838  | 17.200760 |
| 20            | 6             | 0           | 16.557295               | 8.534327  | 16.806248 |
| 21            | 1             | 0           | 16.501815               | 8.478382  | 15.694957 |
| 22            | 6             | 0           | 16.609362               | 10.027768 | 17.205830 |
| 23            | 1             | 0           | 15.719281               | 10.591303 | 16.859124 |
| 24            | 1             | 0           | 17.509224               | 10.515963 | 16.779112 |
| 25            | 1             | 0           | 16.655051               | 10.131130 | 18.309418 |
| 26            | 6             | 0           | 17.846835               | 7.813286  | 17.230640 |
| 27            | 1             | 0           | 18.070301               | 7.969893  | 18.305911 |
| 28            | 1             | 0           | 18.711003               | 8.210667  | 16.661754 |
| 29            | 1             | 0           | 17.784266               | 6.723851  | 17.045210 |
| 30            | 6             | 0           | 11.493579               | 7.609705  | 16.448658 |
| 31            | 1             | 0           | 11.675126               | 8.177322  | 15.509196 |
| 32            | 6             | 0           | 10.458774               | 8.412641  | 17.264876 |
| 33            | 1             | 0           | 9.533317                | 8.563447  | 16.672711 |
| 34            | 1             | 0           | 10.850952               | 9.408434  | 17.555397 |
| 35            | 1             | 0           | 10.172456               | 7.879748  | 18.194642 |
| 36            | 6             | 0           | 10.952090               | 6.223968  | 16.042111 |
| 37            | 1             | 0           | 11.687493               | 5.669106  | 15.425019 |
| 38            | 1             | 0           | 10.013181               | 6.325554  | 15.460190 |
| 39            | 1             | 0           | 10.727682               | 5.600252  | 16.931698 |
| 40            | 6             | 0           | 14.186640               | 5.833208  | 12.423030 |
| 41            | 6             | 0           | 13.603784               | 6.288939  | 10.293690 |
| 42            | 1             | 0           | 13.380591               | 6.905601  | 9.415485  |
| 43            | 6             | 0           | 13.618255               | 4.922079  | 10.455321 |
| 44            | 1             | 0           | 13.404532               | 4.115482  | 9.747030  |
| 45            | 6             | 0           | 14.192337               | 3.363852  | 12.389521 |
| 46            | 6             | 0           | 15.485519               | 2.794090  | 12.253082 |
| 47            | 6             | 0           | 15.685591               | 1.547166  | 12.877513 |
| 48            | 1             | 0           | 16.665632               | 1.054572  | 12.800179 |
| 49            | 6             | 0           | 14.652525               | 0.920879  | 13.590394 |
| 50            | 1             | 0           | 14.833332               | -0.056216 | 14.064571 |
| 51            | 6             | 0           | 13.388990               | 1.521039  | 13.701826 |
| 52            | 1             | 0           | 12.596172               | 1.005456  | 14.262182 |
| 53            | 6             | 0           | 13.118226               | 2.766696  | 13.100352 |
| 54            | 6             | 0           | 16.584651               | 3.449555  | 11.419217 |
| 55            | 1             | 0           | 16.402337               | 4.549244  | 11.416655 |
| 56            | 6             | 0           | 17.993316               | 3.231006  | 11.997884 |

|    |   |   |           |          |           |
|----|---|---|-----------|----------|-----------|
| 57 | 1 | 0 | 18.035161 | 3.484464 | 13.073625 |
| 58 | 1 | 0 | 18.728134 | 3.865507 | 11.463014 |
| 59 | 1 | 0 | 18.328700 | 2.180728 | 11.876919 |
| 60 | 6 | 0 | 16.517036 | 2.946903 | 9.958196  |
| 61 | 1 | 0 | 16.695811 | 1.852612 | 9.919763  |
| 62 | 1 | 0 | 17.292260 | 3.441025 | 9.337758  |
| 63 | 1 | 0 | 15.531206 | 3.134173 | 9.486855  |
| 64 | 6 | 0 | 11.729443 | 3.399629 | 13.161694 |
| 65 | 1 | 0 | 11.857276 | 4.507315 | 13.135353 |
| 66 | 6 | 0 | 10.902908 | 2.992037 | 11.919421 |
| 67 | 1 | 0 | 11.394091 | 3.285540 | 10.969392 |
| 68 | 1 | 0 | 9.899909  | 3.464734 | 11.943940 |
| 69 | 1 | 0 | 10.762234 | 1.891958 | 11.893421 |
| 70 | 6 | 0 | 10.967505 | 3.061928 | 14.455237 |
| 71 | 1 | 0 | 10.046601 | 3.674069 | 14.525256 |
| 72 | 1 | 0 | 11.580305 | 3.254506 | 15.358692 |
| 73 | 1 | 0 | 10.648371 | 1.999931 | 14.476412 |
| 74 | 6 | 0 | 14.239423 | 8.252549 | 11.753130 |
| 75 | 1 | 0 | 13.550954 | 8.859336 | 11.133184 |
| 76 | 1 | 0 | 15.286203 | 8.475783 | 11.451281 |
| 77 | 6 | 0 | 16.229403 | 5.689776 | 14.477160 |
| 78 | 6 | 0 | 16.590888 | 4.657251 | 15.371374 |
| 79 | 1 | 0 | 15.815456 | 4.053837 | 15.869254 |
| 80 | 6 | 0 | 17.951434 | 4.403384 | 15.621047 |
| 81 | 1 | 0 | 18.237597 | 3.599423 | 16.316075 |
| 82 | 6 | 0 | 18.940274 | 5.177361 | 14.989101 |
| 83 | 1 | 0 | 20.004103 | 4.979817 | 15.191364 |
| 84 | 6 | 0 | 18.577798 | 6.205599 | 14.096187 |
| 85 | 1 | 0 | 19.356229 | 6.807682 | 13.603124 |
| 86 | 6 | 0 | 17.224404 | 6.462984 | 13.835285 |
| 87 | 1 | 0 | 16.947667 | 7.271544 | 13.139129 |

**Table S7.** Optimized Cartesian coordinates (Å) of the cation of [(SIMes)PPh<sub>2</sub>]<sup>+</sup>.

| Center Number | Atomic Number | Atomic Type | Coordinates (Angstroms) |           |           |
|---------------|---------------|-------------|-------------------------|-----------|-----------|
|               |               |             | X                       | Y         | Z         |
| 1             | 15            | 0           | -1.230630               | 0.994199  | 11.927730 |
| 2             | 7             | 0           | -1.673595               | -0.345190 | 14.515871 |
| 3             | 7             | 0           | -2.387047               | -1.384393 | 12.693289 |
| 4             | 6             | 0           | 0.535438                | 3.713480  | 17.945328 |
| 5             | 1             | 0           | -0.224560               | 4.220239  | 18.571409 |
| 6             | 1             | 0           | 1.001414                | 4.480841  | 17.288571 |
| 7             | 1             | 0           | 1.336794                | 3.332659  | 18.611461 |
| 8             | 6             | 0           | -0.059005               | 2.609248  | 17.107150 |
| 9             | 6             | 0           | -1.450102               | 2.452425  | 16.975641 |
| 10            | 1             | 0           | -2.124367               | 3.122104  | 17.534528 |
| 11            | 6             | 0           | -2.014404               | 1.472664  | 16.134148 |
| 12            | 6             | 0           | -1.130514               | 0.642088  | 15.409243 |
| 13            | 6             | 0           | -1.820524               | -0.264196 | 13.181968 |
| 14            | 6             | 0           | -2.560847               | -1.687349 | 11.295964 |
| 15            | 6             | 0           | -3.819404               | -1.484885 | 10.686856 |
| 16            | 6             | 0           | -3.932554               | -1.776833 | 9.311965  |
| 17            | 1             | 0           | -4.903492               | -1.611234 | 8.817134  |
| 18            | 6             | 0           | -2.850039               | -2.267248 | 8.559256  |
| 19            | 6             | 0           | -2.988661               | -2.577965 | 7.087791  |
| 20            | 1             | 0           | -2.239226               | -2.018438 | 6.489159  |
| 21            | 1             | 0           | -3.995310               | -2.325103 | 6.701791  |
| 22            | 1             | 0           | -2.810857               | -3.657093 | 6.893558  |
| 23            | 6             | 0           | -5.318289               | 2.761980  | 10.546163 |
| 24            | 6             | 0           | -5.078537               | 2.624014  | 11.925794 |
| 25            | 1             | 0           | -5.844654               | 2.932454  | 12.654141 |
| 26            | 6             | 0           | -3.864410               | 2.081908  | 12.376386 |
| 27            | 1             | 0           | -3.693785               | 1.955136  | 13.454749 |

|    |   |   |           |           |           |
|----|---|---|-----------|-----------|-----------|
| 28 | 6 | 0 | -2.872990 | 1.686366  | 11.449825 |
| 29 | 6 | 0 | -3.125729 | 1.812794  | 10.065817 |
| 30 | 1 | 0 | -2.370955 | 1.475665  | 9.337772  |
| 31 | 6 | 0 | -4.344659 | 2.350252  | 9.618341  |
| 32 | 1 | 0 | -4.534890 | 2.446148  | 8.538141  |
| 33 | 6 | 0 | -2.063891 | -1.693354 | 15.009514 |
| 34 | 1 | 0 | -2.736563 | -1.591484 | 15.883191 |
| 35 | 1 | 0 | -1.150293 | -2.234653 | 15.336303 |
| 36 | 6 | 0 | -2.742913 | -2.329349 | 13.777505 |
| 37 | 1 | 0 | -2.359888 | -3.340039 | 13.533979 |
| 38 | 1 | 0 | -3.848416 | -2.393967 | 13.868909 |
| 39 | 6 | 0 | -1.445993 | -2.206437 | 10.582052 |
| 40 | 6 | 0 | -1.616193 | -2.479371 | 9.216273  |
| 41 | 1 | 0 | -0.761637 | -2.874684 | 8.642855  |
| 42 | 6 | 0 | -5.017768 | -0.976222 | 11.449821 |
| 43 | 1 | 0 | -4.758865 | -0.621444 | 12.465204 |
| 44 | 1 | 0 | -5.790095 | -1.769044 | 11.544941 |
| 45 | 1 | 0 | -5.484794 | -0.122913 | 10.917393 |
| 46 | 6 | 0 | -0.115792 | -2.416391 | 11.264790 |
| 47 | 1 | 0 | 0.383535  | -1.439535 | 11.454081 |
| 48 | 1 | 0 | 0.566159  | -3.024656 | 10.640560 |
| 49 | 1 | 0 | -0.220810 | -2.922675 | 12.247137 |
| 50 | 6 | 0 | 0.785074  | 1.725816  | 16.400164 |
| 51 | 1 | 0 | 1.877452  | 1.830604  | 16.500280 |
| 52 | 6 | 0 | 0.277975  | 0.725234  | 15.557522 |
| 53 | 6 | 0 | 1.204810  | -0.235175 | 14.850664 |
| 54 | 1 | 0 | 0.855809  | -0.497888 | 13.832010 |
| 55 | 1 | 0 | 1.299111  | -1.186173 | 15.420081 |
| 56 | 1 | 0 | 2.220994  | 0.192441  | 14.755022 |
| 57 | 6 | 0 | -3.517678 | 1.335096  | 16.046894 |
| 58 | 1 | 0 | -4.000265 | 2.319620  | 15.876901 |
| 59 | 1 | 0 | -3.931544 | 0.941687  | 17.000054 |
| 60 | 1 | 0 | -3.841462 | 0.653500  | 15.236745 |
| 61 | 6 | 0 | -0.344669 | 2.309339  | 12.866758 |
| 62 | 6 | 0 | 1.062226  | 2.282331  | 12.714520 |
| 63 | 1 | 0 | 1.530361  | 1.494436  | 12.102298 |
| 64 | 6 | 0 | 1.864981  | 3.253650  | 13.334650 |
| 65 | 1 | 0 | 2.958594  | 3.221466  | 13.211221 |
| 66 | 6 | 0 | 1.266882  | 4.272938  | 14.094048 |
| 67 | 6 | 0 | -0.133569 | 4.321464  | 14.227100 |
| 68 | 1 | 0 | -0.603818 | 5.122754  | 14.817648 |
| 69 | 6 | 0 | -0.938596 | 3.351826  | 13.612482 |
| 70 | 1 | 0 | -2.030582 | 3.410760  | 13.719469 |
| 71 | 1 | 0 | 1.891964  | 5.041811  | 14.574554 |
| 72 | 1 | 0 | -6.271116 | 3.186165  | 10.193034 |

**Table S8.** Selected NBO and AIM parameters for cationic phosphines.

|                                                      | <b>1</b>       | <b>2</b>       | <b>3</b>       | <b>4<sup>†</sup></b> | <b>[(SIMes)PPh<sub>2</sub>]<sup>+ ‡</sup></b> |
|------------------------------------------------------|----------------|----------------|----------------|----------------------|-----------------------------------------------|
| P–C <sub>cation</sub> bond polarization              | 33% P<br>67% C | 35% P<br>65% C | 33% P<br>67% C | 33% P<br>67% C       | 33% P / 39% P<br>67% C / 61% C                |
| ρ at P–C <sub>cation</sub> BCP (a.u.)                | 0.147          | 0.153          | 0.146          | 0.149 / 0.149        | 0.143 / 0.161                                 |
| ∇ <sup>2</sup> ρ at P–C <sub>cation</sub> BCP (a.u.) | -0.013         | -0.049         | -0.055         | -0.048 / -0.049      | -0.066 / -0.233                               |
| Lone pair (NBO) energy (meV)                         | -500.28        | -468.98        | -492.43        | -645.03              | -483.26                                       |
| I(r) at VSCC (meV)                                   | 623.76         | 620.08         | 613.91         | 760.87               | 614.75                                        |

<sup>†</sup> Multiplicity of values corresponds to those for the different P–C<sub>cation</sub> bonds.

<sup>‡</sup> Multiplicity of values corresponds to comparison between the P–C<sub>cation</sub> and P–C<sub>phenyl</sub> bonds.

BCP = bond critical point

VSCC = valence shell charge concentration
